# Supplementary material for: Natural variation in salt-induced changes in root:shoot ratio reveals SR3G as a negative regulator of root suberization and salt resilience in Arabidopsis
Source: eLife. 2025 Mar 28;13:RP98896. doi: 10.7554/eLife.98896 (PMC11952752; doi:10.7554/eLife.98896)
Supplement: Supplementary file 1. — The root and shoot projected area were quantified using a custom developed tool. The change in the root and shoot area over time was used to calculate Growth Factor (GF) by fitting an exponential function. The broad sense heritability (H2) was calculated for each trait over individual days and conditions using MVApp. This file supplements Figure 1. [file elife-98896-supp1.xlsx]

## Sheet: Supplementary File 1
Supplementary file 1. The individual traits recorded and calculated from the HapMap accessions exposed to the three different levels of salt stress. The root and shoot projected area were quantified using a custom developed tool. The change in the root and shoot area over time was used to calculate Growth Factor (GF) by fitting an exponential function. The broad sense heritability (H2) was calcul…
Trait	condition	Description	unit	Population Mean	Standard Deviation	broadsense heritability
Shoot_d2	0 mM NaCl	Shoot area under control conditions 2 days after transfer (6 days after germination)	pixels	315.613	92.3928	0.7354
	75 mM NaCl			265.662	71.8896	0.7379
	125 mM NaCl			212.678	51.77	0.8039
Shoot_d4	0 mM NaCl	Shoot area under control conditions 4 days after transfer (8 days after germination)	pixels	689.692	232.325	0.7761
	75 mM NaCl			493.901	155.183	0.8045
	125 mM NaCl			307.427	83.6046	0.8447
Shoot_d6	0 mM NaCl	Shoot area under control conditions 6 days after transfer (10 days after germination)	pixels	1788.88	680.767	0.8587
	75 mM NaCl			971.351	375.657	0.8655
	125 mM NaCl			452.721	140.477	0.8622
Shoot_d8	0 mM NaCl	Shoot area under control conditions 8 days after transfer (12 days after germination)	pixels	4032.6	1509.48	0.864
	75 mM NaCl			1718.13	736.994	0.8902
	125 mM NaCl			653.026	237.253	0.8794
Root_d2	0 mM NaCl	Root area under control conditions 2 days after transfer (6 days after germination)	pixels	303.718	88.8463	0.8665
	75 mM NaCl			239.826	64.8341	0.8634
	125 mM NaCl			170.832	43.9202	0.8748
Root_d4	0 mM NaCl	Root area under control conditions 4 days after transfer (8 days after germination)	pixels	760.925	262.444	0.824
	75 mM NaCl			445.328	128.451	0.8403
	125 mM NaCl			250.957	64.8784	0.8173
Root_d6	0 mM NaCl	Root area under control conditions 6 days after transfer (10 days after germination)	pixels	1920.8	701.175	0.8622
	75 mM NaCl			798.8	284.44	0.8251
	125 mM NaCl			357.362	109.644	0.8062
Root_d8	0 mM NaCl	Root area under control conditions 8 days after transfer (12 days after germination)	pixels	4241.07	1715.15	0.844
	75 mM NaCl			1472.12	640.401	0.8268
	125 mM NaCl			527.767	205.54	0.8221
Shoot_GF	0 mM NaCl	Shoot Growth Factor	e ^ (pixels / day)	0.425422	0.047604	0.7207
	75 mM NaCl			0.304386	0.0562076	0.8472
	125 mM NaCl			0.182577	0.04311	0.7452
Root_GF	0 mM NaCl	Shoot Growth Factor	e ^ (pixels / day)	0.434955	0.0425275	0.7932
	75 mM NaCl			0.292041	0.0467287	0.821
	125 mM NaCl			0.179974	0.0447653	0.8293
						0.7207
