# Supplementary material for: Natural variation in salt-induced changes in root:shoot ratio reveals SR3G as a negative regulator of root suberization and salt resilience in Arabidopsis
Source: eLife. 2025 Mar 28;13:RP98896. doi: 10.7554/eLife.98896 (PMC11952752; doi:10.7554/eLife.98896)
Supplement: Supplementary file 3. — The location of individual SNPs is listed according to its location on Chromosome (Chr) and position (Pos). The individual SNP Minor Allele Count (MAC) and Minor Allele Frequency (MAF) is calculated based on specific SNP set used (4 Million or 250 Thousand – listed in ‘Mapping’ column). The traits associated with individual SNPs are abbreviated as RpS for Root-per-Shoot, SpT for Shoot-per-Total seedling area, Tot for Total seedling area, GR for growth rate, and SHIIT for Shoot Ion Independent Tolerance index (Salt/Control). This file supplements Figure 2. [file elife-98896-supp3.xlsx]

## Sheet: Supplementary Fie 3
Supplementary file 3. Significant associations identified with GWAS of all used traits. The location of individual SNPs is listed according to its location on Chromosome (Chr) and position (Pos). The individual SNP Minor Allele Count (MAC) and Minor Allele Frequency (MAF) is calculated based on specific SNP set used (4 Million or 250 Thousand – listed in “Mapping” column). The traits associated w…
SNP	Chr	Pos	locus	MAC	MAF	Pval	variance_explained	LOD	trait	Bonf.threshold.MAC.specific	Mapping
1- 1829395	1	1829395	locus 2	4	0.0120846	5.68e-09	0.0984455	8.24556	SpT_SHIIT_d8_125	7.7584	4M
1- 1830338	1	1830338	locus 2	4	0.0120846	5.68e-09	0.0984455	8.24556	SpT_SHIIT_d8_125	7.7584	4M
1- 1830467	1	1830467	locus 2	4	0.0120846	5.68e-09	0.0984455	8.24556	SpT_SHIIT_d8_125	7.7584	4M
1- 1830882	1	1830882	locus 2	4	0.0120846	5.68e-09	0.0984455	8.24556	SpT_SHIIT_d8_125	7.7584	4M
1- 1831576	1	1831576	locus 2	4	0.0120846	5.68e-09	0.0984455	8.24556	SpT_SHIIT_d8_125	7.7584	4M
1- 4856238	1	4856238	locus 3	4	0.0120846	1.5e-08	0.0932347	7.82393	RpS_GF_125	7.7584	4M
1- 4878407	1	4878407	locus 4	4	0.0120846	1.53e-08	0.0931106	7.81391	RpS_125p0	7.7584	4M
1- 4878407	1	4878407	locus 4	4	0.0120846	8.31e-09	0.0964038	8.08014	RpS_GF_125	7.7584	4M
1- 5356387	1	5356387	locus 5	155	0.468278	4.78e-07	0.0744844	6.32048	SpT_SHIIT_d6_125	5.30703	250k
1- 18964482	1	18964482	locus 7	10	0.0302115	1.47e-08	0.0933257	7.83128	RpS_GF_125	7.63065	4M
1- 22469886	1	22469886	locus 11	4	0.0120846	1.55e-08	0.0930414	7.80833	RpS_GF_125	7.7584	4M
1- 23721396	1	23721396	locus 12	7	0.021148	4.49e-09	0.099701	8.34741	Root_d8_125mM	7.68552	4M
1- 28431725	1	28431725	locus 13	4	0.0120846	1.17e-08	0.0945538	7.9305	Tot_d4_125	7.7584	4M
2- 354608	2	354608	locus 14	11	0.0332326	8.33e-09	0.0963973	8.07961	RpS_d8_125	7.6142	4M
2- 6246630	2	6246630	locus 15	64	0.193353	4.19e-07	0.0752084	6.37817	Shoot_d6_125mM	6.37624	250k
2- 6246630	2	6246630	locus 15	64	0.193353	2.56e-07	0.0778882	6.59195	Tot_d6_125	6.37624	250k
2- 8151557	2	8151557	locus 16	30	0.0906344	2.6e-08	0.0902692	7.58476	RpS_125p0	7.40134	4M
2- 17488361	2	17488361	locus 22	5	0.0151057	6.18e-09	0.0979974	8.20923	RpS_GF_125	7.73092	4M
2- 18896375	2	18896375	locus 23	4	0.0120846	3.47e-09	0.101082	8.45959	Shoot_d8_125mM	7.7584	4M
3- 7958556	3	7958556	locus 25	104	0.314199	7.19e-07	0.0722591	6.1433	SpT_SHIIT_d4_125	6.11801	250k
3- 14111794	3	14111794	locus 27	4	0.0120846	4.36e-09	0.0998624	8.36052	Shoot_d8_125mM	7.7584	4M
3- 15594042	3	15594042	locus 28	4	0.0120846	1.62e-08	0.0928324	7.79145	Shoot_d8_125mM	7.7584	4M
3- 18598807	3	18598807	locus 30	149	0.450151	2.14e-06	0.0662987	5.66987	SpT_d6_125	5.51378	250k
3- 18599570	3	18599570	locus 30	149	0.450151	8.06e-07	0.071633	6.0935	SpT_d6_125	5.51378	250k
3- 18599721	3	18599721	locus 30	149	0.450151	2.3e-06	0.065895	5.63785	RpS_d6_125	5.51378	250k
3- 18599721	3	18599721	locus 30	149	0.450151	5.78e-07	0.0734497	6.23807	SpT_d6_125	5.51378	250k
3- 18599721	3	18599721	locus 30	149	0.450151	2.61e-06	0.0652029	5.58298	SpT_d8_125	5.51378	250k
3- 18599932	3	18599932	locus 30	151	0.456193	1.19e-06	0.069507	5.92451	RpS_d6_125	5.45472	250k
3- 18599932	3	18599932	locus 30	151	0.456193	2.73e-07	0.0775287	6.56324	SpT_d6_125	5.45472	250k
3- 18599932	3	18599932	locus 30	151	0.456193	2.47e-06	0.06552	5.60812	SpT_d8_125	5.45472	250k
3- 18599932	3	18599932	locus 30	151	0.456193	2.8e-07	0.0773994	6.55292	SpT_d6_125	6.19886	4M
3- 18600074	3	18600074	locus 30	152	0.459215	6.4e-07	0.0728917	6.19364	SpT_d6_125	6.16762	4M
3- 18600108	3	18600108	locus 30	152	0.459215	6.4e-07	0.0728917	6.19364	SpT_d6_125	6.16762	4M
3- 18600218	3	18600218	locus 30	152	0.459215	6.4e-07	0.0728917	6.19364	SpT_d6_125	6.16762	4M
3- 18600349	3	18600349	locus 30	152	0.459215	6.4e-07	0.0728917	6.19364	SpT_d6_125	6.16762	4M
3- 18601782	3	18601782	locus 30	123	0.371601	8.07e-07	0.0716292	6.09319	SpT_d6_125	5.94138	250k
3- 22168514	3	22168514	locus 31	4	0.0120846	1.29e-07	0.0815927	6.88809	RpS_125p0	6.6294	250k
3- 22168514	3	22168514	locus 31	4	0.0120846	5.29e-08	0.0864357	7.2764	RpS_GF_125	6.6294	250k
4- 6267354	4	6267354	locus 35	42	0.126888	3.1e-07	0.0768367	6.50802	Tot_d6_125	6.48958	250k
4- 10888695	4	10888695	locus 39	5	0.0151057	2.13e-09	0.103692	8.67192	Shoot_d8_125mM	7.73092	4M
4- 10889812	4	10889812	locus 39	5	0.0151057	2.13e-09	0.103692	8.67192	Shoot_d8_125mM	7.73092	4M
4- 10895818	4	10895818	locus 39	4	0.0120846	4.39e-09	0.0998279	8.35772	Shoot_d8_125mM	7.7584	4M
4- 10896084	4	10896084	locus 39	4	0.0120846	4.39e-09	0.0998279	8.35772	Shoot_d8_125mM	7.7584	4M
4- 16080790	4	16080790	locus 40	4	0.0120846	2.81e-09	0.102208	8.55112	RpS_125p0	7.7584	4M
4- 17792213	4	17792213	locus 42	33	0.0996979	2.27e-08	0.0910105	7.64449	Shoot_d4_125mM	7.3761	4M
4- 17792213	4	17792213	locus 42	33	0.0996979	2.95e-09	0.101959	8.53086	Tot_d4_125	7.3761	4M
5- 25301006	5	25301006	locus 45	4	0.0120846	8.75e-09	0.0961322	8.05815	SpT_SHIIT_d2_125	7.7584	4M
5- 25302603	5	25302603	locus 45	4	0.0120846	8.75e-09	0.0961322	8.05815	SpT_SHIIT_d2_125	7.7584	4M
