# Supplementary material for: Natural variation in salt-induced changes in root:shoot ratio reveals SR3G as a negative regulator of root suberization and salt resilience in Arabidopsis
Source: eLife. 2025 Mar 28;13:RP98896. doi: 10.7554/eLife.98896 (PMC11952752; doi:10.7554/eLife.98896)
Supplement: Supplementary file 4. — The most important associations identified through GWAS (Supplementary file 3) were inspected further for their functions using either T-DNA or RNAi mutant lines. List of oligos used for genotyping, RT-qPCR, cloning, and Y1H assay are provided. This file supplements Figure 2. [file elife-98896-supp4.xlsx]

## Sheet: Supplementary File 4-page1
Table S4. Most important GWAS associations. The most important associations identified through GWAS (Table S3) were inspected further for their functions using either T-DNA or RNAi mutant lines. List of oligoes used for genotyping, RT-qPCR, cloning, and Y1H assay are provided.
Chromosome	Position	-log10(p-value)	MAC	Associated traits	locus	Target gene	gene description	location	KAUST coding	SALK number
2	11680845, 11681976	5.82, 6.01	147, 143	RpS_GF_75	locus 19	At2g27280	Protein of unknown function DUF2040	exon	C1.01	SALK_072933
								exon	C1.02	SALK_085433
								exon	C1.03	SALK_020268
						At2g27285	Coiled-coil domain-containing protein 55 (DUF2040)	promotor	C1.04	SALK_060975
								UTR5	C1.05	SALK_076033
								promotor	C1.06	SALK_130638
								exon	C1.07	SALK_136230
								UTR5	C1.08	SALK_152509
								intron	C1.09	SALK_069730
						At2g27290	Protein of unknown function (DUF1279)	UTR5	C1.10	SALK_067267
								intron	C1.11	SALK_037263
						At2g27300	NTL8	promotor	C1.12	SALK_113218
								UTR5	C1.13	SAIL_730_B02
								UTR5	C1.14	SALK_087226
3	7958556	6.1433	104	SpT_SHIIT_d4_125	locus 25	At3g22425	IMIDAZOLEGLYCEROL-PHOSPHATE DEHYDRATASE	exon	C4.01	SALK_009063
								intron	C4.02	SAIL_84_A01
								exon	C4.03	SALK_138834
						At3g22430	Domain of unknown function XS (InterPro:IPR005380)	exon	C4.04	SALK_130747
								exon	C4.05	SALK_130745
								intron	C4.06	SALK_101023
								exon	C4.07	SALK_141967
								intron	C4.08	SALK_027795
						At3g22436	unknown	exon	C4.09	SAIL_1166_E09
								promotor	C4.10	SALK_068579
								promotor	C4.11	SALK_105807
								promotor	C4.12	SALK_110451
						At3g22440	FRIGIDA-like protein	UTR5	C4.13	SALK_041276
								intron	C4.14	SALK_042654
3	18598807, 18599570, 18599721, 18599932, 18600074, 18600108, 18600218, 18600349, 18601782	5.67, 6.09, 5.64, 6.24, 5.58, 5.92, 6.56, 5.61, 6.55, 6.19, 6.09	149, 151, 152, 123	SpT_d6_125, RpS_d6_125, SpT_d8_125	locus 30	At3g50150	Plant protein of unknown function (DUF247)	UTR5	C5.01	SALK_003824
								promotor	C5.02	SALK_003826
								exon	C5.03	SALK_109348
								exon	C5.04	SALK_071080
								promotor	C5.05	SALK_044685
								UTR5	C5.06	SALK_069239
						At3g50160 (SR3G)	Salt Root:shoot Ratio Regulator Gene	intron	C5.08	SAIL_608_C06
								exon	C5.09	SAIL_690_E12
						At3g50170	Plant protein of unknown function (DUF247)	UTR5	C5.10	SALK_132700
								UTR5	C5.11	SALK_152813
								exon	C5.12	SALK_145999
								exon	C5.13	SALK_008710
								intron	C5.14	SALK_112602
								exon	C5.15	SALK_009186
								exon	C5.16	SALK_072937
						At3g50180	Plant protein of unknown function (DUF247)	exon	C5.17	SALK_151411
								exon	C5.18	SALK_114526
						At3g50190	Plant protein of unknown function (DUF247)	exon	C5.19	SALK_127332
								exon	C5.20	SALK_137791
								UTR5	C5.21	SALK_134748
								UTR5	C5.22	SALK_135575

## Sheet: Supplementary File 4-page2
List of primer sequences used for genotyping T-DNA lines.
Primer name	Sequence 5' to 3' direction	Purpose
duf_160_4_LB_NEW (78)	ATTCGATATCCCAAAAATGGC	To diagnose sr3g-4 T-DNA allele - wt reaction	(AT3G50160)-Main DUF247
duf_160_4_RB_NEW (79)	GAAATGCTTGTTCTTGATGGC	To diagnose sr3g-4 T-DNA allele - wt reaction	(AT3G50160)-Main DUF247
duf_160_4_RB_NEW (79)	GAAATGCTTGTTCTTGATGGC	To diagnose sr3g-4 T-DNA allele - border reaction	(AT3G50160)-Main DUF247
SAIL_BP3 (45)	TAGCATCTGAATTTCATAACCAATCTCGATACAC	To diagnose sr3g-4 T-DNA allele -border reaction	(AT3G50160)-Main DUF247
duf_160_4/5_LB (25)	GAAACACGAGAGACCATGGTG	To diagnose sr3g-5 T-DNA allele - wt reaction	(AT3G50160)-Main DUF247
duf_160_4/5_RB (26)	CAAGAACGAGCAAAAACTTCG	To diagnose sr3g-5 T-DNA allele - wt reaction	(AT3G50160)-Main DUF247
duf_160_4/5_RB (26)	CAAGAACGAGCAAAAACTTCG	To diagnose sr3g-5 T-DNA allele - border reaction	(AT3G50160)-Main DUF247
SAIL_BP3 (45)	TAGCATCTGAATTTCATAACCAATCTCGATACAC	To diagnose sr3g-5 T-DNA allele - border reaction	(AT3G50160)-Main DUF247
F1-WRKY75 (140)	acgtcattggagagatcattcgtc	To diagnose wrky75-1 and wrky75-3 T-DNA allele - wt reaction	(AT5G13080)-WRKY75
R1-WRKY75 (141)	ctttcggtgggtagttagagacta	To diagnose wrky75-1 and wrky75-3 T-DNA allele - wt reaction	(AT5G13080)-WRKY75
R2-WRKY75 (143)	tagatcatgtatctcggctagct	To diagnose wrky75-1 T-DNA allele - border reaction	(AT5G13080)-WRKY75
SALK_LB (1682 from DOI: 10.1093/plphys/kiab021)	ATTTTGCCGATTTCGGAAC	To diagnose wrky75-1 T-DNA allele - border reaction	(AT5G13080)-WRKY75
F1-WRKY75 (140)	acgtcattggagagatcattcgtc	To diagnose wrky75-3 T-DNA allele - border reaction	(AT5G13080)-WRKY75
SALK_BP (44)	ATTTTGCCGATTTCGGAAC	To diagnose wrky75-3 T-DNA allele - border reaction	(AT5G13080)-WRKY75
120_1_LB_NEW (82)	ATTGGGTGATCTCGATCACAG	To genotype 120.1 T-DNA allele - wt reaction
120_1_RB_NEW (83)	ccacatcaatacatcatgattcc	To genotype 120.1 T-DNA allele - wt reaction
120_1_RB_NEW (83)	ccacatcaatacatcatgattcc	To genotype 120.1 T-DNA allele - border reaction
GABI_LBb1-3 (46)	ATTTTGCCGATTTCGGAAC	To genotype 120.1 T-DNA allele - border reaction
duf_120_1/2/3_LB (13)	AATCAAGATCAAAACCTCCCC	To genotype 120.2 and 120.3 T-DNA allele - wt reaction
duf_120_1/2/3_RB (14)	CCACATCAATACATCATGATTCC	To genotype 120.2 and 120.3 T-DNA allele - wt reaction
duf_120_1/2/3_RB (14)	CCACATCAATACATCATGATTCC	To genotype 120.2 and 120.3 T-DNA allele - border reaction
SAIL_BP3	TAGCATCTGAATTTCATAACCAATCTCGATACAC	To genotype 120.2 and 120.3 T-DNA allele - border reaction
duf_140_1_LB (15)	TATATAATGCTTTGGCGAGCG	To genotype 140.1 T-DNA allele - wt reaction
duf_140_1_RB (16)	ATTTCTCCTTTTCAGCTGCAG	To genotype 140.1 T-DNA allele - wt reaction
duf_140_1_RB (16)	ATTTCTCCTTTTCAGCTGCAG	To genotype 140.1 T-DNA allele - border reaction
SALK_BP (44)	ATTTTGCCGATTTCGGAAC	To genotype 140.1 T-DNA allele - border reaction
duf_140_2/3_LB (17)	AGCGATTAGAAATGTTCGTCG	To genotype 140.2 and 140.3 T-DNA allele - wt reaction
duf_140_2/3_RB (18)	ATCCAAATCACCCATTCTTCC	To genotype 140.2 and 140.3 T-DNA allele - wt reaction
duf_140_2/3_RB (18)	ATCCAAATCACCCATTCTTCC	To genotype 140.2 and 140.3 T-DNA allele - border reaction
SALK_BP (44)	ATTTTGCCGATTTCGGAAC	To genotype 140.2 and 140.3 T-DNA allele - border reaction
duf_150_1_LB (19)	TTTGTTATGCCTCTGGGTCTG	To genotype 150.1 T-DNA allele - wt reaction
duf_150_1_RB (20)	TTGTCCTTGATCGAGATCACC	To genotype 150.1 T-DNA allele - wt reaction
duf_150_1_RB (20)	TTGTCCTTGATCGAGATCACC	To genotype 150.1 T-DNA allele - border reaction
SALK_BP (44)	ATTTTGCCGATTTCGGAAC	To genotype 150.1 T-DNA allele - border reaction
duf_150_2.3_RB (21)	CAGCTTTGGGACATTGAATTC	To genotype 150.2 and 150.3 T-DNA allele - wt reaction
duf_150_2.3._LB (22)	TCAGACATGCAAATTGCAAAC	To genotype 150.2 and 150.3 T-DNA allele - wt reaction
duf_150_2.3._LB (22)	TCAGACATGCAAATTGCAAAC	To genotype 150.2 and 150.3 T-DNA allele - border reaction
SALK_BP (44)	ATTTTGCCGATTTCGGAAC	To genotype 150.2 and 150.3 T-DNA allele - border reaction
160_1_REV_NEW (80)	tgagcatggtgaacaagcaacct	To genotype 160.1 T-DNA allele - wt reaction
160_1_FW_NEW (81)	cagacccagaggcataacaaa	To genotype 160.1 T-DNA allele - wt reaction
160_1_REV_NEW (80)	tgagcatggtgaacaagcaacct	To genotype 160.1 T-DNA allele - border reaction
SALK_BP (44)	ATTTTGCCGATTTCGGAAC	To genotype 160.1 T-DNA allele - border reaction
duf_160_1.2.3_LB (23)	ACAAAGCCATGGTCAAAACAG	To genotype 160.2 and 160.3 T-DNA allele - wt reaction
duf_160_1.2.3_RB (24)	AGAAACGCAGGTGTTGAGTTC	To genotype 160.2 and 160.3 T-DNA allele - wt reaction
duf_160_1.2.3_RB (24)	AGAAACGCAGGTGTTGAGTTC	To genotype 160.2 and 160.3 T-DNA allele - border reaction
SALK_BP (44)	ATTTTGCCGATTTCGGAAC	To genotype 160.2 and 160.3 T-DNA allele - border reaction
duf_160_4_LB_NEW (78)	ATTCGATATCCCAAAAATGGC	To genotype 160.4 T-DNA allele - wt reaction
duf_160_4_RB_NEW (79)	GAAATGCTTGTTCTTGATGGC	To genotype 160.4 T-DNA allele - wt reaction
duf_160_4_RB_NEW (79)	GAAATGCTTGTTCTTGATGGC	To genotype 160.4 T-DNA allele - border reaction
SAIL_BP3 (45)	TAGCATCTGAATTTCATAACCAATCTCGATACAC	To genotype 160.4 T-DNA allele - border reaction
duf_160_4/5_LB (25)	GAAACACGAGAGACCATGGTG	To genotype 160.5 T-DNA allele - wt reaction
duf_160_4/5_RB (26)	CAAGAACGAGCAAAAACTTCG	To genotype 160.5 T-DNA allele - wt reaction
duf_160_4/5_RB (26)	CAAGAACGAGCAAAAACTTCG	To genotype 160.5 T-DNA allele - border reaction
SAIL_BP3 (45)	TAGCATCTGAATTTCATAACCAATCTCGATACAC	To genotype 160.5 T-DNA allele - border reaction
duf_170_1_LB (27)	TGACTAGGAATACGCGAGTGG	To genotype 170.1 T-DNA allele - wt reaction
duf_170_1_RB/2_LB (28)	TAATCCATTTCATGACCAGCG	To genotype 170.1 T-DNA allele - wt reaction
duf_170_1_RB/2_LB (28)	TAATCCATTTCATGACCAGCG	To genotype 170.1 T-DNA allele - border reaction
SALK_BP (44)	ATTTTGCCGATTTCGGAAC	To genotype 170.1 T-DNA allele - border reaction
duf_170_1_RB/2_LB (28)	TAATCCATTTCATGACCAGCG	To genotype 170.2 T-DNA allele - wt reaction
duf_170_2_RB (29)	AAACCAAACCGGTATAGTGGC	To genotype 170.2 T-DNA allele - wt reaction
duf_170_2_RB (29)	AAACCAAACCGGTATAGTGGC	To genotype 170.2 T-DNA allele - border reaction
SALK_BP (44)	ATTTTGCCGATTTCGGAAC	To genotype 170.2 T-DNA allele - border reaction
duf_170_3/4_LB (30)	TACTTGCTCAGCCTCAAGCTC	To genotype 170.3 and 170.4 T-DNA allele - wt reaction
duf_170_3/4_RB (31)	CCTTTGAGCTTACCATCATGG	To genotype 170.3 and 170.4 T-DNA allele - wt reaction
duf_170_3/4_RB (31)	CCTTTGAGCTTACCATCATGG	To genotype 170.3 and 170.4 T-DNA allele - border reaction
SALK_BP (44)	ATTTTGCCGATTTCGGAAC	To genotype 170.3 and 170.4 T-DNA allele - border reaction
duf_170_5_LB (32)	AATTGAATGCATCAATCCTCG	To genotype 170.5 T-DNA allele - wt reaction
duf_170_5_RB (33)	GAGGTTGGGTGTTTGAATTTC	To genotype 170.5 T-DNA allele - wt reaction
duf_170_5_RB (33)	GAGGTTGGGTGTTTGAATTTC	To genotype 170.5 T-DNA allele - border reaction
SALK_BP (44)	ATTTTGCCGATTTCGGAAC	To genotype 170.5 T-DNA allele - border reaction
duf_180_1/2_LB (34)	CGTGACCGAACTAAGAGATGC	To genotype 180.1 and 180.2 T-DNA allele - wt reaction
duf_180_1/2_RB (35)	cgagaaaaacctcatctactt	To genotype 180.1 and 180.2 T-DNA allele - wt reaction
duf_180_1/2_RB (35)	cgagaaaaacctcatctactt	To genotype 180.1 and 180.2 T-DNA allele - border reaction
SALK_BP (44)	ATTTTGCCGATTTCGGAAC	To genotype 180.1 and 180.2 T-DNA allele - border reaction
duf_190_1/2_LB (36)	TTCAACAACATTTTGCAAAGTG	To genotype 190.1 and 190.2 T-DNA allele - wt reaction
duf_190_1/2_RB (37)	ATGTAGCAATTTTTGTTGGCG	To genotype 190.1 and 190.2 T-DNA allele - wt reaction
duf_190_1/2_RB (37)	ATGTAGCAATTTTTGTTGGCG	To genotype 190.1 and 190.2 T-DNA allele - border reaction
SALK_BP (44)	ATTTTGCCGATTTCGGAAC	To genotype 190.1 and 190.2 T-DNA allele - border reaction
duf_200_1_LB (38)	TCATGCACCAACATAAACCAC	To genotype 200.1 T-DNA allele - wt reaction
duf_200_1_RB (39)	TCCAATGACCAACCAATTCTC	To genotype 200.1 T-DNA allele - wt reaction
duf_200_1_RB (39)	TCCAATGACCAACCAATTCTC	To genotype 200.1 T-DNA allele - border reaction
SALK_BP (44)	ATTTTGCCGATTTCGGAAC	To genotype 200.1 T-DNA allele - border reaction
duf_200_2_LB (40)	GAACAGACTAACTTCGACGCG	To genotype 200.2 T-DNA allele - wt reaction
duf_200_2_RB (41)	GCTTTTTCAGGAAATTGGGAG	To genotype 200.2 T-DNA allele - wt reaction
duf_200_2_RB (41)	GCTTTTTCAGGAAATTGGGAG	To genotype 200.2 T-DNA allele - border reaction
SALK_BP (44)	ATTTTGCCGATTTCGGAAC	To genotype 200.2 T-DNA allele - border reaction
duf_200_3_LB (42)	AAACTTCGAAAAAGATGATTTGC	To genotype 200.3 T-DNA allele - wt reaction
duf_200_3_RB (43)	TGTGTCGTCGTCTCTATGTGC	To genotype 200.3 T-DNA allele - wt reaction
duf_200_3_RB (43)	TGTGTCGTCGTCTCTATGTGC	To genotype 200.3 T-DNA allele - border reaction
SALK_BP (44)	ATTTTGCCGATTTCGGAAC	To genotype 200.3 T-DNA allele - border reaction

## Sheet: Supplementary File 4-page3
List of primer sequences used for evaluating gene expression in RNAi lines.
Primer name	Sequence 5' to 3' direction	Purpose
DUF130_qpcr_FWD (96)	ACCGGCTTCTCTTAGTTCGGTC	To evaluate gene expression of DUF130
DUF130_qpcr_REV (97)	CTTGTTCGAATCCGGAGCCAAG	To evaluate gene expression of DUF130
DUF140_qpcr_FWD (98)	AGCGGTTTCCTGGACCATCTAC	To evaluate gene expression of DUF140
DUF140_qpcr_REV (99)	GGATGTTTTCCGTCGAAGTCTGC	To evaluate gene expression of DUF140
DUF150_qpcr_FWD (100)	GTGTATGGCACTGCTCGAAAGC	To evaluate gene expression of DUF150
DUF150_qpcr_REV (101)	GAAAGAAACCGGCCAGCTTTGG	To evaluate gene expression of DUF150
DUF160_qpcr_FWD (102)	ATCCCAAAAATGGCCGGTTTCC	To evaluate gene expression of DUF160 (SR3G)
DUF160_qpcr_REV (103)	TGAGCATGGTGAACAAGCAACC	To evaluate gene expression of DUF160 (SR3G)
DUF170_qpcr_FWD (104)	CCGGTCGGTTTTCCTTTTCCTG	To evaluate gene expression of DUF170
DUF170_qpcr_Rev (105)	ACTAGGAATACGCGAGTGGTGG	To evaluate gene expression of DUF170
DUF180_qpcr_FWD (106)	ACCGGCATCTCTTAGTTCGGTC	To evaluate gene expression of DUF180
DUF180_qpcr_REV (107)	TGCTCTTCCCAAGATCATCCGG	To evaluate gene expression of DUF180
DUF190_qpcr_FWD (108)	TCTACGCGATAACCTTGGCTCC	To evaluate gene expression of DUF190
DUF190_qpcr_Rev (109)	CCCAATTGCTGACAAGGACAAGG	To evaluate gene expression of DUF190
At1g07920_Fw (112)	GTATTTGGTCGCGTGTCTGT	To evaluate gene expression of housekeeping gene
At1g07920_Rev(113)	AATGTGTGTGTAGATCCGCC	To evaluate gene expression of housekeeping gene

## Sheet: Supplementary File 4-page4
List of primer sequences used for cloning purpose.
Primer name	Sequence 5' to 3' direction	Purpose
FragmentA_Fw_001 (3)	GGTCTCTGGCTCCATGGTTTCGGTTTTGGATGGT	To clone DUF247 - Fragment A
FragmentA_Rev_001 (4)	GGTCTCACTGATCCGATTTCCTGGAATCCTTC	To clone DUF247 - Fragment A
FragmentB_Fw_001 (5)	GGTCTCGGGCTCCTATGCACCCAATGACCCGGTT	To clone DUF247 - Fragment B
FragmentB_Rev_001 (6)	GGTCTCACTGAGTTATTGAAGTACTTGTGTCT	To clone DUF247 - Fragment B
FragmentA_Fw_001 (3)	GGTCTCTGGCTCCATGGTTTCGGTTTTGGATGGT	To clone DUF247 - Fragment AB
FragmentB_Rev_001 (6)	GGTCTCACTGAGTTATTGAAGTACTTGTGTCT	To clone DUF247 - Fragment AB
seqp_UBQProm_Fw (56)	acccaaagagctcttcttcttcaca	To sequence DUF247 greengate final constructs
seqp_mCherry_Rev (57)	ggggtgcttcacgtaggccttg	To sequence DUF247 greengate final constructs
seqp_mCherry_Fw (58)	acaacgaggactacaccatcgt	To sequence DUF247 greengate final constructs
seqp_FrB_Rev (59)	ACCTGCGTTTCTTAGTTCAGTCACGC	To sequence DUF247 greengate final constructs
seqp_FrB_Fw (60)	CCATGACGGTACCAAGTCTCTCTT	To sequence DUF247 greengate final constructs
seqp_UBQTerm_Rev (61)	agtcgagtcactttgcaggcgt	To sequence DUF247 greengate final constructs
seqp_UBQTerm_Fw (62)	gcgaaagtgttgagctgttgggttct	To sequence DUF247 greengate final constructs
seqp_BASTA_Rev (63)	gacgagccagggatagcgct	To sequence DUF247 greengate final constructs

## Sheet: Supplementary File 4-page5
List of primer sequences used for RT-qPCR.
Primer name	Sequence 5' to 3' direction	Purpose
DUF160_qpcr_FWD (102)	ATCCCAAAAATGGCCGGTTTCC	For RT-qPCR of SR3G (At3g50160) - Forward
DUF160_qpcr_REV 1 (103)	TGAGCATGGTGAACAAGCAACC	For RT-qPCR of SR3G (At3g50160) - Reverse
At4g04120_Fw (116)	TCCCGTGTGGTCGACTTGA	For RT-qPCR of house-keeping gene (AT4G04120, transposable_element_gene) - Forward
At4g04120_Rev (117)	CCCTATCATTCGAGATCTGCTTCT	For RT-qPCR of AT4G04120 (AT4G04120, transposable_element_gene) - Reverse
F-RT-WRKY75 (144)	TGGAGGATGCAATGTGAAGAA	For RT-qPCR of WRKY75 (At5g13080) - Forward
R-RT-WRKY75 (145)	TTCTCGATGGGATGCGAATG	For RT-qPCR of WRKY75 (At5g13080) - Reverse
DUF120_qpcr_FWD 1 (94)	CTGGCCAGATTTAGTCAACGGC	For RT-qPCR of other DUF247 (At3g50120) - Forward
DUF120_qpcr_REV 1 (95)	CTTGGTACACGGAACCAAACCG	For RT-qPCR of other DUF247 (At3g50120) - Reverse
DUF130_qpcr_FWD 1 (96)	ACCGGCTTCTCTTAGTTCGGTC	For RT-qPCR of other DUF247 (At3g50130) - Forward
DUF130_qpcr_REV 1 (97)	CTTGTTCGAATCCGGAGCCAAG	For RT-qPCR of other DUF247 (At3g50130) - Reverse
DUF140_qpcr_FWD 1 (98)	AGCGGTTTCCTGGACCATCTAC	For RT-qPCR of other DUF247 (At3g50140) - Forward
DUF140_qpcr_REV 1 (99)	GGATGTTTTCCGTCGAAGTCTGC	For RT-qPCR of other DUF247 (At3g50140) - Reverse
DUF150_qpcr_FWD 1 (100)	GTGTATGGCACTGCTCGAAAGC	For RT-qPCR of other DUF247 (At3g50150) - Forward
DUF150_qpcr_REV 1 (101)	GAAAGAAACCGGCCAGCTTTGG	For RT-qPCR of other DUF247 (At3g50150) - Reverse
DUF170_qpcr_FWD 1 (104)	CCGGTCGGTTTTCCTTTTCCTG	For RT-qPCR of other DUF247 (At3g50170) - Forward
DUF170_qpcr_Rev 1 (105)	ACTAGGAATACGCGAGTGGTGG	For RT-qPCR of other DUF247 (At3g50170) - Reverse
DUF190_qpcr_FWD 1 (108)	TCTACGCGATAACCTTGGCTCC	For RT-qPCR of other DUF247 (At3g50190) - Forward
DUF190_qpcr_Rev 1 (109)	CCCAATTGCTGACAAGGACAAGG	For RT-qPCR of other DUF247 (At3g50190) - Reverse
DUF200_qpcr_FWD 1 (110)	AACGTCTCCATGCAGAGCTCTC	For RT-qPCR of other DUF247 (At3g50200) - Forward
DUF200_qpcr_REV 1 (111)	CGGAAGAGACCACAGGAGACAG	For RT-qPCR of other DUF247 (At3g50200) - Reverse

## Sheet: Supplementary File 4-page6
Primers used for molecular cloning for Y1H.
Primer name	Sequence 5' to 3' direction
WRKY75_EcoRⅠ-F	CGGAATTCATGGAGGGATATGATAATGGG
WRKY75_XhoⅠ-R	CCCTCGAGGAAAGAAGAGTAGATTTGCAT
DUF247(At3g50150)_HindⅢ-proF	CCCAAGCTTACCTagtagaagattatgcg
DUF247(At3g50150)_KpnⅠ-proR	CGGGGTACCgatttctgctcgtcaatg
SR3G (At3g50160)_HindⅢ-proF	CCCAAGCTTttgggggtttttc
SR3G (At3g50160)_KpnⅠ-proR	CGGGGTACCaatttctgtaggttg
