# Supplementary material for: Natural variation in salt-induced changes in root:shoot ratio reveals SR3G as a negative regulator of root suberization and salt resilience in Arabidopsis
Source: eLife. 2025 Mar 28;13:RP98896. doi: 10.7554/eLife.98896 (PMC11952752; doi:10.7554/eLife.98896)
Supplement: Supplementary file 5. — This file supplements Figure 3. [file elife-98896-supp5.xlsx]

## Sheet: Supplementary File 5
Supplementary file 5. The gene ID, species, and gene names used for identification of SR3G orthologs and paralogs. This file supplements Figure 3.
GoGe-GeneID (Contains Hyperlin)	Species	Name (In this study)
CDS:Al_scaffold_0005_1866	Arabidopsis lyrata	Arl1866
CDS:fgenesh2_kg.5__1366__AT3G50170	Arabidopsis lyrata	Arl1366
CDS:fgenesh1_pm.C_scaffold_5001137	Arabidopsis lyrata	Arl1137
CDS:fgenesh2_kg.5__1362__AT3G50120	Arabidopsis lyrata	Arl1362
CDS:fgenesh2_kg.5__1364__AT3G50140	Arabidopsis lyrata	Arl1364
CDS:fgenesh2_kg.5__1365__AT3G50150	Arabidopsis lyrata	Arl1365
AT3G50150	Arabidopsis thaliana	AT3G50150
AT3G50140	Arabidopsis thaliana	AT3G50140
AT3G50160	Arabidopsis thaliana	AT3G50160
AT3G50170	Arabidopsis thaliana	AT3G50170
AT3G50180	Arabidopsis thaliana	AT3G50180
AT3G50190	Arabidopsis thaliana	AT3G50190
AT3G50130	Arabidopsis thaliana	AT3G50130
AT3G50120	Arabidopsis thaliana	AT3G50120
Bra012904	Brassica rapa	Bra012904
Bra012906	Brassica rapa	Bra012906
Bra012905	Brassica rapa	Bra012905
Bra022103	Brassica rapa	Bra022103
Bra012907	Brassica rapa	Bra012907
Bra036057	Brassica rapa	Bra036057
Bra036056	Brassica rapa	Bra036056
Carubv10018846m.v1.0	Capsella rubella	Carubv10018846
Carubv10019405m.v1.0	Capsella rubella	Carubv10019405
Carubv10016996m.v1.0	Capsella rubella	Carubv10016996
Carubv10019318m.v1.0	Capsella rubella	Carubv10019318
Carubv10018880m.v1.0	Capsella rubella	Carubv10018880
Carubv10018618m.v1.0	Capsella rubella	Carubv10018618
Carubv10019135m.v1.0	Capsella rubella	Carubv10019135
CARHR159210	Cardamine hirsuta	Cahir159210
CARHR159180	Cardamine hirsuta	Cahir159180
CARHR159190	Cardamine hirsuta	Cahir159190
CARHR159240	Cardamine hirsuta	Cahir159240
CARHR159200	Cardamine hirsuta	Cahir159200
CARHR159250	Cardamine hirsuta	Cahir159250
PAC:20207124	Thalophila halophila	Thah20207124
PAC:20206980	Thalophila halophila	Thah20206980
PAC:20207554	Thalophila halophila	Thah20207554
PAC:20207856	Thalophila halophila	Thah20207856
PAC:20207430	Thalophila halophila	Thah20207430
Tp5g12000	Eutrema parvulum	Eup5g12000
Tp5g11980	Eutrema parvulum	Eup5g11980
Tp5g11960	Eutrema parvulum	Eup5g11960
Tp5g11990	Eutrema parvulum	Eup5g11990
Csa09g052970	Camelina sativa	Csa09g052970
Csa04g035720	Camelina sativa	Csa04g035720
Csa06g024200	Camelina sativa	Csa06g024200
Csa09g053030	Camelina sativa	Csa09g053030
Csa09g053010	Camelina sativa	Csa09g053010
Csa04g035750	Camelina sativa	Csa04g035750
Csa04g035780	Camelina sativa	Csa04g035780
Csa04g035710	Camelina sativa	Csa04g035710
