# Supplementary material for: Natural variation in salt-induced changes in root:shoot ratio reveals SR3G as a negative regulator of root suberization and salt resilience in Arabidopsis
Source: eLife. 2025 Mar 28;13:RP98896. doi: 10.7554/eLife.98896 (PMC11952752; doi:10.7554/eLife.98896)
Supplement: Supplementary file 7. — This file supports Figure 5. [file elife-98896-supp7.xlsx]

## Sheet: Sheet1
Construct name	Description	Link to file
UBQ_mVenus_DUF247FrABC	Construct containing full-length DUF247 with ubiquitin 10 promoter and mVenus as N-terminal tag	https://benchling.com/s/seq-QcV3IX5BLkgfIbVxObo8?m=slm-sVUQGoPYvYiAOLs6jE3w
UBQ_mVenus_DUF247FrA	Construct containing fragment A of DUF247 with ubiquitin 10 promoter and mVenus as N-terminal tag	https://benchling.com/s/seq-RSF2odmonyIZYdjClnhz?m=slm-jLYNvLGowUUpw2sDEG50
UBQ_mVenus_DUF247FrB	Construct containing fragment B of DUF247 with ubiquitin 10 promoter and mVenus as N-terminal tag	https://benchling.com/s/seq-sXbcUXzfU83OEOefenni?m=slm-647NVXjQhLQdKp2xuu1p
UBQ_mVenus_DUF247FrAB	Construct containing fragments AB of DUF247 with ubiquitin 10 promoter and mVenus as N-terminal tag	https://benchling.com/s/seq-eEgz2ZyNoo2uC1YRojta?m=slm-cImgKXymEUUsvfzZxwhi
